# Supplementary material
Source: publisher figshare collection journal article supplement (https://acs.figshare.com/ndownloader/files/4377979)
Supplement: Supplementary file 1 [file 4377979]

**Supporting Information for**

**$\pi$ -Conjugated Poly(aryleneethynylene)s Consisting of Salophen and Ni-Salophen Units**

**in the  $\pi$ -Conjugated Main Chain: Preparation and Chemical Properties**

Hiroki Fukumoto\*, Kazuto Yamane, Yumiko Kase, and Takakazu Yamamoto\*

Chemical Resources Laboratory, Tokyo Institute of Technology,

4259 Nagatsuta, Midori-ku, Yokohama 226-8503, Japan.

**X-ray Crystallography.** The crystal of **Br<sub>2</sub>-Salophen-Ni** was mounted in a glass capillary. Measurements were made on a Rigaku Saturn CCD area detector with graphite monochromated Mo-K $\alpha$  radiation ( $\lambda = 0.71075$  Å). The data were collected to a maximum  $2\theta$  value of 55.0 ° at 293 K. A total of 720 oscillation images were collected. The distance between the crystal and camera was 44.99 mm, and readout was performed in the 0.070 mm pixel mode.

The structure of **Br<sub>2</sub>-Salophen-Ni** was solved by direct method (SIR92), and refined by full-matrix least-squares method. Non-hydrogen atoms and hydrogen atoms were refined anisotropically and isotropically, respectively. All calculations were performed using Rigaku CrystalClear software package. Crystal data and data collection parameters, and selected bond distance and angles of **Br<sub>2</sub>-Salophen-Ni** were summarized in Table S1 and Table S2, respectively. ORTEP drawing of the structure was shown in Figure S1. The crystal structure data of **Br<sub>2</sub>-Salophen-Ni** (CCDC number 785112) was deposited at the Cambridge Crystallographic Data Centre. The data can be obtained free of charge via [www.ccdc.cam.ac.uk/data\\_request/cif](http://www.ccdc.cam.ac.uk/data_request/cif).

**Table S1.** Crystal Data and Data Collection Parameters of **Br<sub>2</sub>-Salophen-Ni**

|                                                                   |                                                                                 |
|-------------------------------------------------------------------|---------------------------------------------------------------------------------|
| Empirical formula                                                 | C <sub>20</sub> H <sub>12</sub> Br <sub>2</sub> N <sub>2</sub> NiO <sub>2</sub> |
| Formula weight                                                    | 530.83                                                                          |
| Crystal system                                                    | orthorhombic                                                                    |
| Space group                                                       | <i>Pbca</i> (No.14)                                                             |
| <i>a</i> , Å                                                      | 10.084(2)                                                                       |
| <i>b</i> , Å                                                      | 14.552(4)                                                                       |
| <i>c</i> , Å                                                      | 24.360(6)                                                                       |
| <i>V</i> , Å <sup>3</sup>                                         | 3574.5(15)                                                                      |
| <i>Z</i>                                                          | 8                                                                               |
| <i>D</i> <sub>calcd</sub> , g/cm <sup>3</sup>                     | 1.973                                                                           |
| <i>F</i> (000)                                                    | 2080                                                                            |
| $\mu$ (MoK $\alpha$ ), cm <sup>-1</sup>                           | 55.89                                                                           |
| Crystal size, mm                                                  | 0.22 x 0.22 x 0.15                                                              |
| No. of reflections measured                                       | 25041                                                                           |
| No. of observation ( <i>I</i> > 3.00( $\sigma$ ))                 | 2624                                                                            |
| No. of variables                                                  | 244                                                                             |
| <i>R</i> <sup>a</sup> ( <i>I</i> > 3.00( $\sigma$ ))              | 0.0518                                                                          |
| <i>R</i> <sub>w</sub> <sup>b</sup> ( <i>I</i> > 3.00( $\sigma$ )) | 0.0681                                                                          |
| GOF                                                               | 0.838                                                                           |
| $\Delta\rho$ , e Å <sup>-3</sup>                                  | 1.22, -1.31                                                                     |

a)  $R = (\sum ||F_o| - |F_c||) / (\sum |F_o|)$  b)  $R_w = [\sum w (|F_o| - |F_c|)^2 / \sum w F_o^2]^{1/2}$

**Table S2.** Selected Bond Distances and Angles of **Br<sub>2</sub>-Salophen-Ni**

---

| Distances (Å)    |           |                  |           |
|------------------|-----------|------------------|-----------|
| Ni – N(1)        | 1.863(4)  | Ni – N(2)        | 1.857(4)  |
| Ni – O(1)        | 1.840(4)  | Ni – O(2)        | 1.847(3)  |
| N(1) – C(1)      | 1.307(5)  | N(2) – C(3)      | 1.316 (6) |
| O(1) – C(2)      | 1.295(6)  | O(2) – C(4)      | 1.303(6)  |
| Angles (°)       |           |                  |           |
| N(1) – Ni – O(1) | 96.07(18) | N(1) – Ni – N(2) | 85.01(19) |
| O(1) – Ni – O(2) | 83.57(17) | O(2) – Ni – N(2) | 95.39(18) |

---

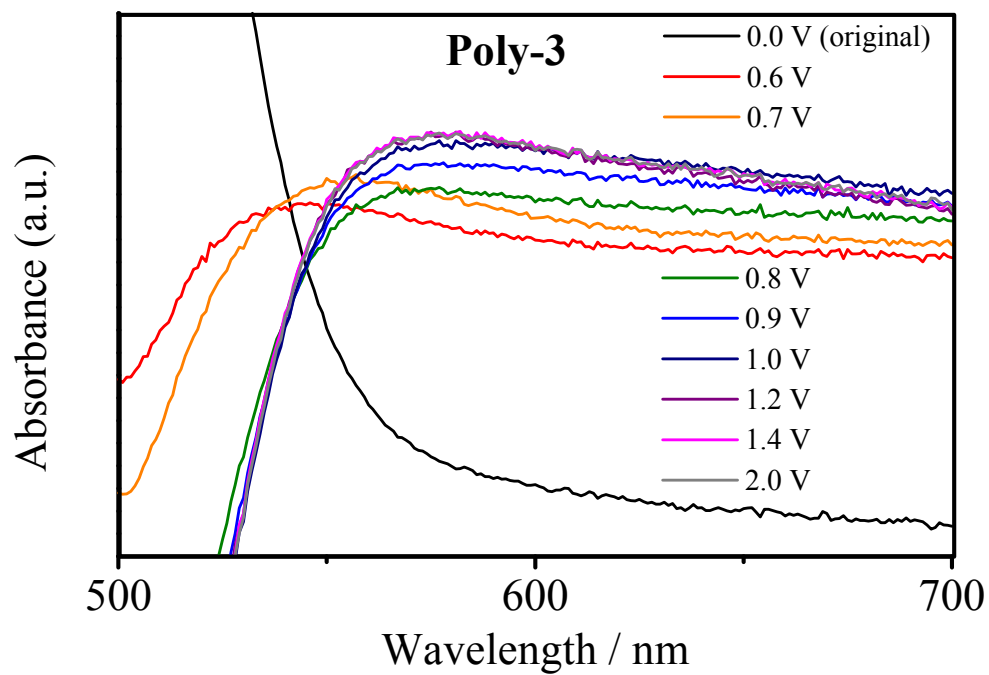

**Figure S1.** Differential UV-vis spectra of **Poly-3** film cast on an ITO glass electrode. Obtained at various applied potentials (vs.  $\text{Ag}^+/\text{Ag}$ ). The UV-vis spectrum of the original **Poly-3** film is also shown.
